# Supplementary material
Source: ML conference proceedings conference paper supplement (https://openaccess.thecvf.com/content/CVPR2026/html/Liao_MSCD-GS_Motion-Separated_Cooperative_CVPR_2026_paper.html)
Supplement: Supplementary file 1 [file Liao_MSCD-GS_Motion-Separated_Cooperative_CVPR_2026_supplemental.pdf]

# MSCD-GS: Motion-Separated Cooperative Deblurring Dynamic Reconstruction via Gaussian Splatting

## Supplementary Material

In the supplementary material, we present the quantitative comparison results for each scene to verify the effectiveness of the proposed method, as shown in Tables 1, 2, and 3. Additional qualitative results are attached to our project page (<https://liaoyongjian1.github.io/MSCD-GS/>).

### 1. Static Gaussians Deblurring

To compensate for the motion blur introduced by camera movement during exposure, we model the static Gaussian trajectory using a learnable continuous  $SE(3)$  motion field. Instead of assuming a fixed camera pose per frame, we represent the exposure-time motion using two trainable  $SE(3)$  control points:

$$\Theta = \{\xi_0, \xi_1\}, \quad \xi_i \in \mathbb{R}^6, \quad (1)$$

where each  $\xi_i$  encodes a minimal  $SE(3)$  perturbation. These control points parameterize the start and end of the exposure interval and are optimized jointly with the Gaussian field. Given these two control points, the static Gaussian transformation at any normalized time within the exposure is obtained through geodesic interpolation on  $SE(3)$ . Therefore, we obtain a set of physically consistent deblurring warps  $\{\Delta R, \Delta T\}$  that compensate for the motion-induced distortion in static Gaussians.

### 2. Dynamic Gaussians Deblurring

The motion blur of dynamic Gaussians arises not only from camera motion but also from the intrinsic movement of objects during exposure. To address this challenge, we propose a neural motion-field predictor, which estimates multi-moment  $SE(3)$  corrections and per-frame geometric offsets for all dynamic Gaussian primitives. Unlike the static-Gaussian module that models camera-induced blur using two  $SE(3)$  control points, predictor captures object-level, nonlinear, and high-frequency motions through a learned continuous motion representation.

To effectively capture local geometric variations motion patterns, we encode both the 3D Gaussian centers  $\mu_D \in \mathbb{R}^3$  using a Fourier feature embedder:

$$\gamma(\mu_D) = [\mu_D, \sin(2^k \mu_D), \cos(2^k \mu_D)]_{k=0}^{K_{\mu_D}}. \quad (2)$$

In addition to position and view embeddings, we encode each dynamic Gaussian’s current geometric state feature:

$$\gamma(S, R_D) = [S, q], \quad (3)$$

where  $q \in \mathbb{H}$  is the quaternion representing Gaussian’s rotation  $R_D$  (normalized with  $\|q\| = 1$ ). The fused feature  $\Upsilon = [\gamma(\mu_D), \gamma(S, R_D)]$  is processed by a residual fully-connected backbone. Ultimately, predictor outputs motion parameters for multiple temporal moments:  $\Delta\mu_D, \Delta R_D, \Delta S$ .

### References

- [1] Jeongmin Bae, Seoha Kim, Youngsik Yun, Hahyun Lee, Gun Bang, and Youngjung Uh. Per-gaussian embedding-based deformation for deformable 3d gaussian splatting. In *ECCV*, 2024. 2, 3
- [2] Liangyu Chen, Xiaojie Chu, Xiangyu Zhang, and Jian Sun. Simple baselines for image restoration. In *ECCV*, pages 17–33. Springer, 2022. 2, 3
- [3] Byeonghyeon Lee, Howoong Lee, Xiangyu Sun, Usman Ali, and Eunbyung Park. Deblurring 3d gaussian splatting. In *ECCV*, pages 127–143. Springer, 2024. 2
- [4] Yiren Lu, Yunlai Zhou, Disheng Liu, Tuo Liang, and Yu Yin. Bard-gs: Blur-aware reconstruction of dynamic scenes via gaussian splatting. In *CVPR*, pages 16532–16542, 2025. 2, 3
- [5] Jongmin Park, Minh-Quan Viet Bui, Juan Luis Gonzalez Bello, Jaeho Moon, Jihyong Oh, and Munchurl Kim. Splinegs: Robust motion-adaptive spline for real-time dynamic 3d gaussians from monocular video. In *CVPR*, pages 26866–26875, 2025. 2, 3
- [6] Huiqiang Sun, Xingyi Li, Liao Shen, Xinyi Ye, Ke Xian, and Zhiguo Cao. Dyblurf: Dynamic neural radiance fields from blurry monocular video. In *CVPR*, pages 7517–7527, 2024. 2, 3
- [7] Qianqian Wang, Vickie Ye, Hang Gao, Weijia Zeng, Jake Austin, Zhengqi Li, and Angjoo Kanazawa. Shape of motion: 4d reconstruction from a single video. In *ICCV*, 2025. 2, 3
- [8] Guanjun Wu, Taoran Yi, Jiemin Fang, Lingxi Xie, Xiaopeng Zhang, Wei Wei, Wenyu Liu, Qi Tian, and Xinggang Wang. 4d gaussian splatting for real-time dynamic scene rendering. In *CVPR*, pages 20310–20320, 2024. 2, 3
- [9] Renlong Wu, Zhilu Zhang, Mingyang Chen, Xiaopeng Fan, Zifei Yan, and Wangmeng Zuo. Deblur4dgs: 4d gaussian splatting from blurry monocular video. *arXiv preprint arXiv:2412.06424*, 2024. 2, 3
- [10] Lingzhe Zhao, Peng Wang, and Peidong Liu. Bad-gaussians: Bundle adjusted deblur gaussian splatting. In *ECCV*, pages 233–250. Springer, 2024. 2

| Types                                       | Methods                       | man    |        |        | seesaw |        |        | skating |        |        |
|---------------------------------------------|-------------------------------|--------|--------|--------|--------|--------|--------|---------|--------|--------|
|                                             |                               | PSNR↑  | SSIM↑  | LPIPS↓ | PSNR↑  | SSIM↑  | LPIPS↓ | PSNR↑   | SSIM↑  | LPIPS↓ |
| Static Deblurring Reconstruction            | Deblurring-3DGS (ECCV'24) [3] | 24.32  | 0.769  | 0.188  | 18.71  | 0.617  | 0.329  | 19.83   | 0.495  | 0.375  |
|                                             | BAD-GS (ECCV'24) [10]         | 23.85  | 0.642  | 0.287  | 23.57  | 0.678  | 0.293  | 22.93   | 0.645  | 0.289  |
| Dynamic Reconstruction                      | 4D Gaussians (CVPR'24) [8]    | 25.15  | 0.837  | 0.273  | 27.38  | 0.849  | 0.303  | 27.26   | 0.872  | 0.269  |
|                                             | E-D3DGS (ECCV'24) [1]         | 25.81  | 0.855  | 0.210  | 29.02  | 0.892  | 0.195  | 29.41   | 0.898  | 0.197  |
|                                             | SoM (ICCV'25) [7]             | 25.89  | 0.909  | 0.232  | 26.45  | 0.931  | 0.193  | 31.22   | 0.963  | 0.165  |
|                                             | SplineGS (CVPR'25) [5]        | 26.59  | 0.885  | 0.238  | 27.76  | 0.921  | 0.191  | 30.05   | 0.951  | 0.174  |
| Dynamic Reconstruction + Deblurring Network | E-D3DGS + NAFNet [2]          | 27.82  | 0.928  | 0.104  | 30.03  | 0.965  | 0.096  | 30.43   | 0.951  | 0.097  |
|                                             | SoM + NAFNet [2]              | 27.90  | 0.926  | 0.107  | 30.05  | 0.963  | 0.099  | 30.45   | 0.968  | 0.100  |
| Dynamic Deblurring Reconstruction           | DyBluRF (CVPR'24) [6]         | 27.81  | 0.920  | 0.111  | 29.93  | 0.950  | 0.094  | 30.47   | 0.966  | 0.099  |
|                                             | BARD-GS (CVPR'25) [4]         | 28.44  | 0.922  | 0.084  | 30.49  | 0.958  | 0.105  | 31.90   | 0.943  | 0.102  |
|                                             | Deblur4DGS (arXiv'25) [9]     | 30.20  | 0.953  | 0.056  | 29.67  | 0.957  | 0.091  | 33.03   | 0.969  | 0.077  |
|                                             | <b>MSCD-GS (Ours)</b>         | 31.72  | 0.930  | 0.052  | 33.33  | 0.969  | 0.040  | 37.00   | 0.975  | 0.026  |
|                                             |                               |        |        |        |        |        |        |         |        |        |
| Methods                                     | PSNR↑                         | street |        | third  |        |        | women  |         |        |        |
|                                             |                               | SSIM↑  | LPIPS↓ | PSNR↑  | SSIM↑  | LPIPS↓ | PSNR↑  | SSIM↑   | LPIPS↓ |        |
| Deblurring-3DGS (ECCV'24) [3]               | 19.72                         | 0.498  | 0.317  | 15.83  | 0.476  | 0.562  | 22.77  | 0.726   | 0.224  |        |
| BAD-GS (ECCV'24) [10]                       | 20.12                         | 0.661  | 0.341  | 21.76  | 0.639  | 0.305  | 25.41  | 0.671   | 0.301  |        |
| 4D Gaussians (CVPR'24) [8]                  | 27.12                         | 0.785  | 0.302  | 28.81  | 0.834  | 0.268  | 25.48  | 0.738   | 0.303  |        |
| E-D3DGS (ECCV'24) [1]                       | 27.19                         | 0.767  | 0.215  | 30.37  | 0.927  | 0.193  | 24.28  | 0.774   | 0.202  |        |
| SoM (ICCV'25) [7]                           | 28.71                         | 0.948  | 0.135  | 29.82  | 0.944  | 0.171  | 24.68  | 0.897   | 0.244  |        |
| SplineGS (CVPR'25) [5]                      | 25.85                         | 0.931  | 0.145  | 30.69  | 0.958  | 0.154  | 24.71  | 0.844   | 0.274  |        |
| E-D3DGS + NAFNet [2]                        | 28.17                         | 0.929  | 0.106  | 30.39  | 0.950  | 0.094  | 26.69  | 0.924   | 0.095  |        |
| SoM + NAFNet [2]                            | 28.20                         | 0.956  | 0.108  | 30.50  | 0.956  | 0.097  | 26.94  | 0.930   | 0.096  |        |
| DyBluRF (CVPR'24) [6]                       | 28.20                         | 0.946  | 0.100  | 30.54  | 0.959  | 0.092  | 25.11  | 0.869   | 0.109  |        |
| BARD-GS (CVPR'25) [4]                       | 30.58                         | 0.960  | 0.101  | 31.50  | 0.958  | 0.091  | 28.43  | 0.926   | 0.093  |        |
| Deblur4DGS (arXiv'25) [9]                   | 30.37                         | 0.961  | 0.098  | 31.11  | 0.957  | 0.089  | 27.51  | 0.901   | 0.104  |        |
| <b>MSCD-GS (Ours)</b>                       | 32.95                         | 0.964  | 0.039  | 32.59  | 0.960  | 0.058  | 31.69  | 0.946   | 0.046  |        |

Table 1. Quantitative comparison of **Deblurring 4D Reconstruction** on the Stereo Blur dataset. Colors indicate the **best**, **second best**, and **third best** results respectively. Our method can reconstruct high-quality 4D scenes compared to similar methods under conditions involving images with motion-blur inputs.

| Types                                       | Methods                       | man    |        |        | seesaw |        |        | skating |        |        |
|---------------------------------------------|-------------------------------|--------|--------|--------|--------|--------|--------|---------|--------|--------|
|                                             |                               | PSNR↑  | SSIM↑  | LPIPS↓ | PSNR↑  | SSIM↑  | LPIPS↓ | PSNR↑   | SSIM↑  | LPIPS↓ |
| Static Deblurring Reconstruction            | Deblurring-3DGS (ECCV'24) [3] | 21.53  | 0.665  | 0.280  | 15.45  | 0.489  | 0.440  | 21.20   | 0.582  | 0.321  |
|                                             | BAD-GS (ECCV'24) [10]         | 22.19  | 0.756  | 0.141  | 22.13  | 0.905  | 0.138  | 22.41   | 0.829  | 0.130  |
| Dynamic Reconstruction                      | 4D Gaussians (CVPR'24) [8]    | 23.62  | 0.852  | 0.210  | 23.84  | 0.886  | 0.190  | 23.75   | 0.880  | 0.203  |
|                                             | E-D3DGS (ECCV'24) [1]         | 23.71  | 0.853  | 0.208  | 24.32  | 0.891  | 0.183  | 25.09   | 0.897  | 0.186  |
|                                             | SoM (ICCV'25) [7]             | 24.84  | 0.889  | 0.238  | 25.57  | 0.913  | 0.200  | 30.11   | 0.946  | 0.169  |
|                                             | SplineGS (CVPR'25) [5]        | 24.76  | 0.875  | 0.240  | 26.04  | 0.922  | 0.173  | 28.30   | 0.938  | 0.170  |
| Dynamic Reconstruction + Deblurring Network | E-D3DGS + NAFNet [2]          | 26.18  | 0.937  | 0.157  | 25.42  | 0.933  | 0.149  | 25.89   | 0.912  | 0.152  |
|                                             | SoM + NAFNet [2]              | 25.12  | 0.876  | 0.172  | 25.93  | 0.911  | 0.158  | 30.47   | 0.953  | 0.163  |
| Dynamic Deblurring Reconstruction           | DyBluRF (CVPR'24) [6]         | 24.30  | 0.919  | 0.151  | 26.56  | 0.930  | 0.128  | 29.14   | 0.915  | 0.134  |
|                                             | BARD-GS (CVPR'25) [4]         | 25.84  | 0.920  | 0.101  | 25.89  | 0.935  | 0.125  | 29.30   | 0.930  | 0.122  |
|                                             | Deblur4DGS (arXiv'25) [9]     | 28.05  | 0.948  | 0.064  | 27.52  | 0.942  | 0.107  | 30.77   | 0.956  | 0.093  |
|                                             | <b>MSCD-GS (Ours)</b>         | 29.64  | 0.949  | 0.054  | 29.76  | 0.945  | 0.051  | 31.84   | 0.960  | 0.054  |
|                                             |                               |        |        |        |        |        |        |         |        |        |
| Methods                                     | PSNR↑                         | street |        | third  |        |        | women  |         |        |        |
|                                             |                               | SSIM↑  | LPIPS↓ | PSNR↑  | SSIM↑  | LPIPS↓ | PSNR↑  | SSIM↑   | LPIPS↓ |        |
| Deblurring-3DGS (ECCV'24) [3]               | 19.29                         | 0.431  | 0.317  | 19.46  | 0.694  | 0.325  | 20.95  | 0.688   | 0.279  |        |
| BAD-GS (ECCV'24) [10]                       | 19.85                         | 0.632  | 0.177  | 20.13  | 0.678  | 0.193  | 21.83  | 0.718   | 0.151  |        |
| 4D Gaussians (CVPR'24) [8]                  | 17.99                         | 0.740  | 0.344  | 26.99  | 0.930  | 0.168  | 17.16  | 0.752   | 0.286  |        |
| E-D3DGS (ECCV'24) [1]                       | 18.04                         | 0.764  | 0.353  | 27.37  | 0.927  | 0.181  | 18.43  | 0.771   | 0.276  |        |
| SoM (ICCV'25) [7]                           | 27.87                         | 0.929  | 0.139  | 28.92  | 0.947  | 0.156  | 23.88  | 0.853   | 0.248  |        |
| SplineGS (CVPR'25) [5]                      | 25.27                         | 0.919  | 0.146  | 28.79  | 0.946  | 0.155  | 23.06  | 0.843   | 0.268  |        |
| E-D3DGS + NAFNet [2]                        | 25.75                         | 0.896  | 0.178  | 27.94  | 0.925  | 0.146  | 20.22  | 0.803   | 0.180  |        |
| SoM + NAFNet [2]                            | 28.15                         | 0.935  | 0.167  | 29.26  | 0.941  | 0.182  | 27.63  | 0.844   | 0.158  |        |
| DyBluRF (CVPR'24) [6]                       | 26.01                         | 0.928  | 0.135  | 27.17  | 0.928  | 0.124  | 22.23  | 0.851   | 0.153  |        |
| BARD-GS (CVPR'25) [4]                       | 27.98                         | 0.942  | 0.122  | 28.90  | 0.948  | 0.112  | 24.20  | 0.890   | 0.113  |        |
| Deblur4DGS (arXiv'25) [9]                   | 28.22                         | 0.944  | 0.093  | 28.96  | 0.955  | 0.104  | 23.50  | 0.865   | 0.114  |        |
| <b>MSCD-GS (Ours)</b>                       | 26.02                         | 0.907  | 0.090  | 31.42  | 0.964  | 0.079  | 28.28  | 0.918   | 0.064  |        |

Table 2. Quantitative comparison of **Novel View Synthesis** on the Stereo Blur dataset. Since our method can reconstruct high-quality 4D scenes, it also achieves state-of-the-art performance in Novel View Synthesis.

| Types                                      | Methods                    | card  |       |        | kitchen |       |        | poster |       |        |
|--------------------------------------------|----------------------------|-------|-------|--------|---------|-------|--------|--------|-------|--------|
|                                            |                            | PSNR↑ | SSIM↑ | LPIPS↓ | PSNR↑   | SSIM↑ | LPIPS↓ | PSNR↑  | SSIM↑ | LPIPS↓ |
| Dynamic Reconstruction                     | 4D Gaussians (CVPR'24) [8] | 24.39 | 0.880 | 0.146  | 21.05   | 0.857 | 0.255  | 24.44  | 0.866 | 0.193  |
|                                            | E-D3DGS (ECCV'24) [1]      | 24.65 | 0.895 | 0.141  | 22.52   | 0.886 | 0.209  | 24.53  | 0.899 | 0.195  |
|                                            | SoM (ICCV'25) [7]          | 24.96 | 0.893 | 0.156  | 21.22   | 0.883 | 0.209  | 24.58  | 0.899 | 0.192  |
|                                            | SplineGS (CVPR'25) [5]     | 24.84 | 0.882 | 0.170  | 22.58   | 0.898 | 0.266  | 25.57  | 0.900 | 0.190  |
| Dynamic Reconstruction + Deblurred Network | E-D3DGS + NAFNet [2]       | 25.68 | 0.891 | 0.138  | 23.26   | 0.894 | 0.196  | 26.11  | 0.901 | 0.191  |
|                                            | SoM + NAFNet [2]           | 25.78 | 0.902 | 0.131  | 23.12   | 0.891 | 0.198  | 26.18  | 0.905 | 0.190  |
| Dynamic Deblurring Reconstruction          | DyBluRF (CVPR'24) [6]      | 24.73 | 0.872 | 0.128  | 21.74   | 0.843 | 0.251  | 25.50  | 0.903 | 0.191  |
|                                            | BARD-GS (CVPR'25) [4]      | 25.76 | 0.833 | 0.170  | 23.47   | 0.833 | 0.167  | 26.96  | 0.836 | 0.189  |
|                                            | Deblur4DGS (arXiv'25) [9]  | 25.62 | 0.901 | 0.109  | 21.91   | 0.860 | 0.171  | 26.54  | 0.849 | 0.188  |
|                                            | <b>MSCD-GS (Ours)</b>      | 29.75 | 0.913 | 0.113  | 30.91   | 0.919 | 0.066  | 29.52  | 0.912 | 0.185  |

  

| Methods                    | shark-spin |       |        | walk  |       |        | windmill |       |        | toy-car |       |        |
|----------------------------|------------|-------|--------|-------|-------|--------|----------|-------|--------|---------|-------|--------|
|                            | PSNR↑      | SSIM↑ | LPIPS↓ | PSNR↑ | SSIM↑ | LPIPS↓ | PSNR↑    | SSIM↑ | LPIPS↓ | PSNR↑   | SSIM↑ | LPIPS↓ |
| 4D Gaussians (CVPR'24) [8] | 22.50      | 0.897 | 0.201  | 18.10 | 0.848 | 0.195  | 24.00    | 0.866 | 0.203  | 21.55   | 0.883 | 0.207  |
| E-D3DGS (ECCV'24) [1]      | 24.07      | 0.905 | 0.229  | 19.20 | 0.896 | 0.166  | 24.06    | 0.897 | 0.205  | 21.70   | 0.895 | 0.203  |
| SoM (ICCV'25) [7]          | 23.73      | 0.904 | 0.206  | 18.35 | 0.899 | 0.162  | 23.91    | 0.901 | 0.243  | 21.50   | 0.902 | 0.221  |
| SplineGS (CVPR'25) [5]     | 24.28      | 0.908 | 0.182  | 18.39 | 0.859 | 0.176  | 23.82    | 0.899 | 0.179  | 21.67   | 0.891 | 0.186  |
| E-D3DGS + NAFNet [2]       | 24.87      | 0.916 | 0.184  | 20.35 | 0.905 | 0.159  | 25.46    | 0.900 | 0.159  | 22.11   | 0.908 | 0.190  |
| SoM + NAFNet [2]           | 24.33      | 0.913 | 0.181  | 20.49 | 0.901 | 0.151  | 25.91    | 0.903 | 0.144  | 22.32   | 0.889 | 0.159  |
| DyBluRF (CVPR'24) [6]      | 23.87      | 0.899 | 0.204  | 19.83 | 0.865 | 0.192  | 24.46    | 0.895 | 0.180  | 20.80   | 0.874 | 0.249  |
| BARD-GS (CVPR'25) [4]      | 25.43      | 0.856 | 0.158  | 23.31 | 0.827 | 0.144  | 27.52    | 0.906 | 0.128  | 23.47   | 0.868 | 0.142  |
| Deblur4DGS (arXiv'25) [9]  | 25.09      | 0.915 | 0.162  | 20.80 | 0.864 | 0.212  | 26.60    | 0.916 | 0.162  | 25.55   | 0.916 | 0.141  |
| <b>MSCD-GS (Ours)</b>      | 27.48      | 0.919 | 0.087  | 23.62 | 0.870 | 0.141  | 28.14    | 0.915 | 0.065  | 27.48   | 0.919 | 0.087  |

Table 3. Quantitative comparison of **Novel View Synthesis** on the real-world blurry dataset. The results demonstrate that our method can achieve state-of-the-art performance in Novel View Synthesis.
